# Supplementary material for: Impact of chemical modifications on the luminescence properties of organic neutral radical emitters
Source: Royal Society of Chemistry journal article supplement (doi:10.1039/d1tc01702k), 2021-01-01
Supplement: d1tc01702k1.pdf [file d1tc01702k1.pdf]

## Supporting Information

### Impact of chemical modifications on the luminescence properties of organic neutral radical emitters #

Eunkyung Cho, Veaceslav Coropceanu,\* and Jean-Luc Brédas\*

Department of Chemistry and Biochemistry  
The University of Arizona  
Tucson, Arizona 85721-0088

# Dedicated to Professor Concepció Rovira and Professor Jaume Veciana, in honor of their seminal contributions to the fields of molecular electronics and magnetism.

\* Email: [coropceanu@arizona.edu](mailto:coropceanu@arizona.edu); [jlbredas@arizona.edu](mailto:jlbredas@arizona.edu)

## Content

**Figure S1.** Energies of the LUMO, SOMO, and doubly occupied HOMO levels in the TTM and donor (isolated) fragments. S3

**Figure S2.** Frontier molecular orbitals of the TTM-1Cz and TTM-xPyID radicals. S3

**Table S1.** Vertical excitation energies (E), transition dipole moments ( $\mu$ ), and oscillator strengths (f) of the lowest ten doublet and lowest quartet excited states in the TTM radical. S4

**Table S2.** Vertical excitation energies (in eV) and (in parentheses) transition dipole moments (in D) of the CT, LE<sub>1</sub>, LE<sub>r1</sub>, and LE<sub>r2</sub> states of the TTM-1Cz and TTM-xPyID radicals. S4

**Figure S3.** Schematic description of the contributions to the transition dipole moments in the CT state due to CT-GS hybridization ( $\mu_{CT}^{CT-GS}$ , red arrows), CT-LE<sub>r1</sub> hybridization ( $\mu_{CT}^{CT-LEr1}$ , green arrows), and CT-LE<sub>r2</sub> hybridization ( $\mu_{CT}^{CT-LEr2}$ , blue arrows) for the TTM-1Cz and TTM-xPyID radicals; yellow dots indicate the center-of-mass for each molecule. S5

**Table S3.** Adiabatic CT energies ( $E_{CT}^a$ ), electronic coupling values ( $V_{CT-GS}$ ), and reorganization energies ( $\lambda$ ) between the CT and ground states in the TTM-1Cz and TTM-xPyID radicals. S5

**Table S4.** Nonradiative decay rates ( $k_{nr}^{CT-GS}$ ) from the coupling between the CT and ground states in the TTM-1Cz and TTM-xPyID radicals calculated by considering different amounts of quantum contributions ( $\lambda_{qm}$ ) to the total reorganization energy  $\lambda$ ;  $\lambda_{qm}$  is assigned to 0, 10, 20, and 50% of  $\lambda$ . S6

**Table S5.** Relaxation energies of the TTM and donor fragments in the neutral state and charged state,  $\lambda_{rel-N}$  (meV) and  $\lambda_{rel-C}$  (meV), obtained from the adiabatic potential surfaces of both neutral and charged states and from a normal-mode analysis; the charged states of the TTM and donor (Cz and xPyID) fragments correspond to the anion and cation states, respectively. S6

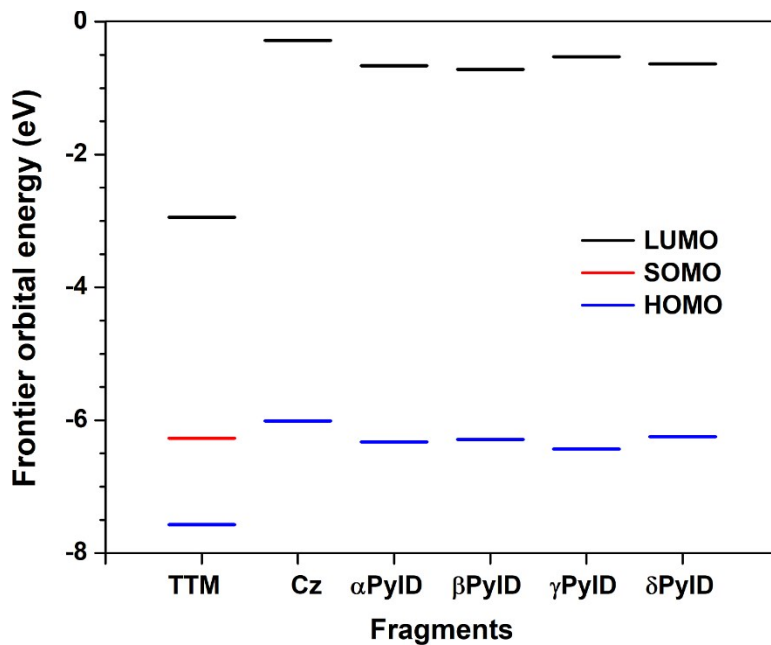

**Figure S1.** Energies of the LUMO, SOMO, and doubly occupied HOMO levels in the TTM and donor (isolated) fragments.

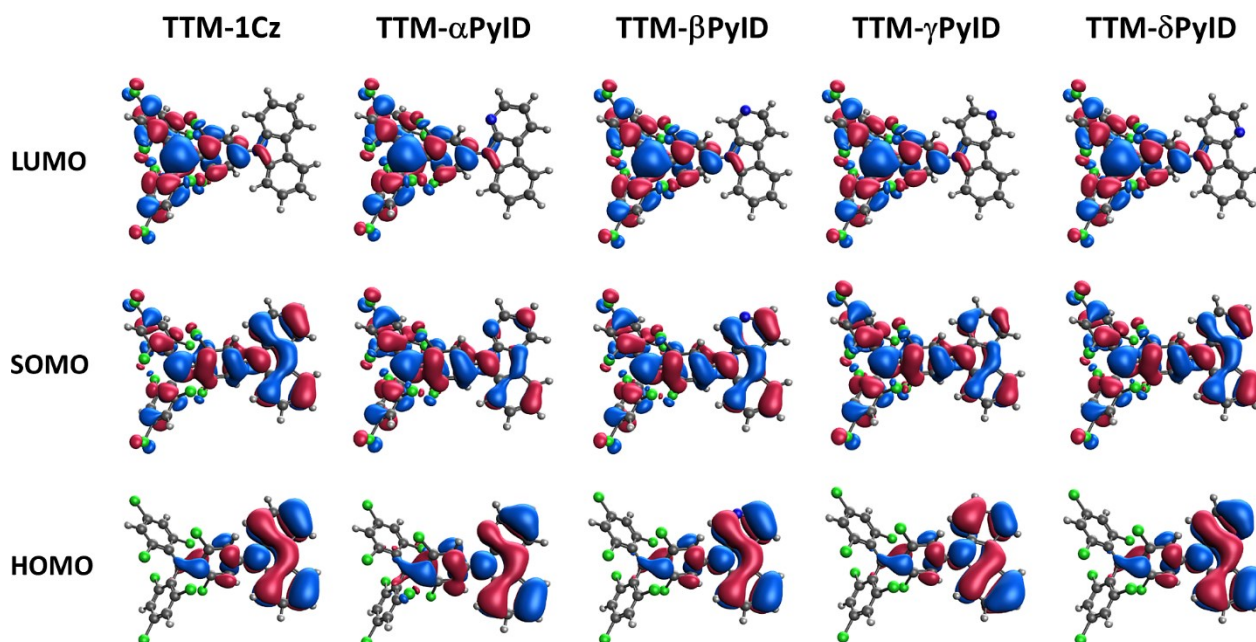

**Figure S2.** Frontier molecular orbitals of the TTM-1Cz and TTM-xPyID radicals.

**Table S1.** Vertical excitation energies (E), transition dipole moments ( $\mu$ ), and oscillator strengths (f) of the lowest ten doublet and lowest quartet excited states in the TTM radical.

|                      | E (eV)      | $\mu$ (D)   | f           |
|----------------------|-------------|-------------|-------------|
| <b>D<sub>1</sub></b> | <b>2.82</b> | <b>1.62</b> | <b>0.03</b> |
| <b>D<sub>2</sub></b> | <b>2.82</b> | <b>1.62</b> | <b>0.03</b> |
| D <sub>3</sub>       | 3.10        | 0.89        | 0.01        |
| D <sub>4</sub>       | 3.10        | 0.62        | 0.00        |
| D <sub>5</sub>       | 3.10        | 0.62        | 0.00        |
| D <sub>6</sub>       | 3.29        | 0.00        | 0.00        |
| <b>D<sub>7</sub></b> | <b>3.55</b> | <b>4.07</b> | <b>0.22</b> |
| <b>D<sub>8</sub></b> | <b>3.55</b> | <b>4.07</b> | <b>0.22</b> |
| D <sub>9</sub>       | 3.74        | 1.05        | 0.02        |
| D <sub>10</sub>      | 3.92        | 0.50        | 0.00        |
| Q <sub>1</sub>       | 3.96        | 0.00        | 0.00        |

**Table S2.** Vertical excitation energies (in eV) and (in parentheses) transition dipole moments (in D) of the CT, LE<sub>1</sub>, LE<sub>r1</sub>, and LE<sub>r2</sub> states of the TTM-1Cz and TTM-xPyID radicals.

| State                                                 | TTM-1Cz     | TTM- $\alpha$ PyID | TTM- $\beta$ PyID | TTM- $\gamma$ PyID | TTM- $\delta$ PyID |
|-------------------------------------------------------|-------------|--------------------|-------------------|--------------------|--------------------|
| D <sub>1</sub> (CT)                                   | 2.19 (3.71) | 2.45 (3.55)        | 2.33 (3.53)       | 2.40 (3.31)        | 2.30 (3.59)        |
| D <sub>2 or 3</sub> <sup>#</sup> (LE <sub>1</sub> )   | 2.82 (1.45) | 2.82 (1.28)        | 2.81 (1.55)       | 2.80 (1.57)        | 2.81 (1.49)        |
| D <sub>8</sub> (LE <sub>r1</sub> )                    | 3.31 (3.68) | 3.37 (4.18)        | 3.33 (3.11)       | 3.33 (3.58)        | 3.32 (3.43)        |
| D <sub>9 or 10</sub> <sup>*</sup> (LE <sub>r2</sub> ) | 3.49 (3.96) | 3.49 (3.95)        | 3.51 (3.91)       | 3.52 (3.75)        | 3.50 (3.95)        |

<sup>#</sup> The D<sub>2</sub> states of the TTM-xPyID radicals and D<sub>3</sub> state of TTM-1Cz are assigned as LE<sub>1</sub>. <sup>\*</sup> The D<sub>10</sub> states of all radicals except TTM- $\alpha$ PyID are assigned as LE<sub>r2</sub>; LE<sub>r2</sub> in the TTM- $\alpha$ PyID is the D<sub>9</sub> state.

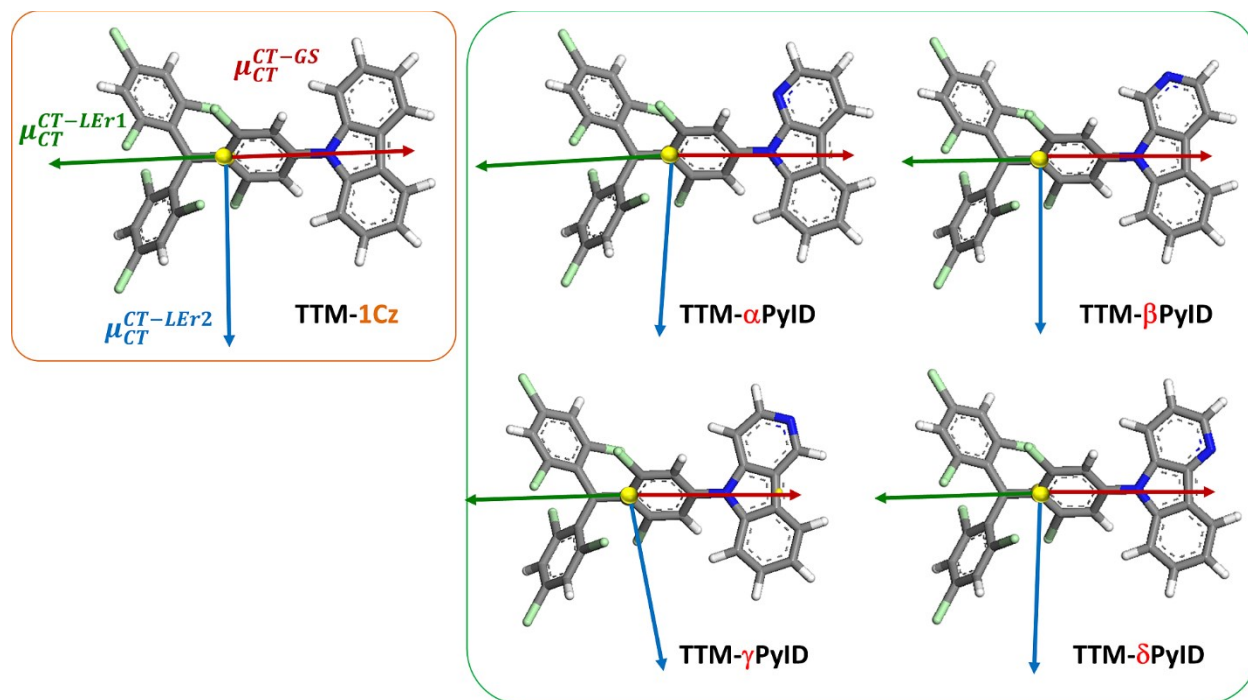

**Figure S3.** Schematic description of the contributions to the transition dipole moments in the CT state due to CT-GS hybridization ( $\mu_{CT}^{CT-GS}$ , red arrows), CT-LE<sub>r1</sub> hybridization ( $\mu_{CT}^{CT-LEr1}$ , green arrows), and CT-LE<sub>r2</sub> hybridization ( $\mu_{CT}^{CT-LEr2}$ , blue arrows) for the TTM-1Cz and TTM-xPyID radicals; yellow dots indicate the center-of-mass for each molecule.

**Table S3.** Adiabatic CT energies ( $E_{CT}^a$ ), electronic coupling values ( $V_{CT-GS}$ ), and reorganization energies ( $\lambda$ ) between the CT and ground states in the TTM-1Cz and TTM-xPyID radicals.

| state             | TTM-1Cz | TTM- $\alpha$ PyID | TTM- $\beta$ PyID | TTM- $\gamma$ PyID | TTM- $\delta$ PyID |
|-------------------|---------|--------------------|-------------------|--------------------|--------------------|
| $V_{CT-GS}$ (meV) | 314     | 435                | 336               | 342                | 337                |
| $E_{CT}^a$ (eV)   | 1.94    | 2.31               | 2.12              | 2.17               | 2.09               |
| $\lambda$ (eV)    | 0.27    | 0.15 <sup>#</sup>  | 0.24              | 0.29               | 0.25               |

<sup>#</sup> The geometry optimization calculation of the CT state in TTM- $\alpha$ PyID yielded unreliable results. Thus, based on the data shown in Table S5, we set the  $\lambda$  value in TTM- $\alpha$ PyID equal to the average value of TTM- $\beta$ PyID and TTM- $\delta$ PyID, *i.e.*, 0.25 eV.

**Table S4.** Nonradiative decay rates ( $k_{nr}^{CT-GS}$ ) from the coupling between the CT and ground states in the TTM-1Cz and TTM-xPyID radicals calculated by considering different amounts of quantum contributions ( $\lambda_{qm}$ ) to the total reorganization energy  $\lambda$ ;  $\lambda_{qm}$  is assigned to 0, 10, 20, and 50% of  $\lambda$ .

| $\lambda_{qm}$     | $k_{nr}^{CT-GS}$ (s <sup>-1</sup> ) |                       |                       |                    |
|--------------------|-------------------------------------|-----------------------|-----------------------|--------------------|
|                    | 0% of $\lambda$                     | 10% of $\lambda$      | 20% of $\lambda$      | 50% of $\lambda$   |
| TTM-1Cz            | $1.59 \times 10^{-28}$              | $4.30 \times 10^1$    | $2.19 \times 10^3$    | $4.35 \times 10^6$ |
| TTM- $\alpha$ PyID | $4.41 \times 10^{-56}$              | $1.58 \times 10^{-3}$ | $2.94 \times 10^{-1}$ | $3.53 \times 10^3$ |
| TTM- $\beta$ PyID  | $7.10 \times 10^{-47}$              | $2.47 \times 10^{-3}$ | $1.18 \times 10^1$    | $2.74 \times 10^4$ |
| TTM- $\gamma$ PyID | $2.97 \times 10^{-36}$              | $2.86 \times 10^{-1}$ | $1.26 \times 10^2$    | $2.76 \times 10^5$ |
| TTM- $\delta$ PyID | $6.45 \times 10^{-42}$              | $3.84 \times 10^{-1}$ | $3.59 \times 10^1$    | $1.22 \times 10^5$ |

**Table S5.** Relaxation energies of the TTM and donor fragments in the neutral state and charged state,  $\lambda_{rel-N}$  (meV) and  $\lambda_{rel-C}$  (meV), obtained from the adiabatic potential surfaces of both neutral and charged states and from a normal-mode analysis; the charged states of the TTM and donor (Cz and xPyID) fragments correspond to the anion and cation states, respectively.

|               | Adiabatic potential surface |                   | Normal mode       |                   |
|---------------|-----------------------------|-------------------|-------------------|-------------------|
|               | $\lambda_{rel-N}$           | $\lambda_{rel-C}$ | $\lambda_{rel-N}$ | $\lambda_{rel-C}$ |
| TTM           | 109                         | 121               | 108               | 125               |
| Cz            | 61                          | 61                | 62                | 60                |
| $\alpha$ PyID | 67                          | 62                | 68                | 62                |
| $\beta$ PyID  | 65                          | 64                | 66                | 64                |
| $\gamma$ PyID | 135                         | 126               | 136               | 129               |
| $\delta$ PyID | 70                          | 66                | 71                | 67                |
